# Supplementary material for: Combating multidrug-resistant bacteria with nanostructured guanidine-based polymers
Source: Royal Society of Chemistry journal article supplement (doi:10.1039/d4nj03085k), 2024-01-01
Supplement: d4nj03085k1.pdf [file d4nj03085k1.pdf]

## **Supporting Information**

### **Combating multidrug-resistant bacteria with nanostructured guanidine-based polymers**

**Jian-Bin Zhen <sup>a,1,\*</sup>, Jia-Jia Yi <sup>b,1,\*</sup>, Xin-Yi Bu <sup>a</sup>, Yi-Long Yao <sup>a</sup>, En-Peng Meng <sup>a</sup>,**

<sup>a</sup> Department of Materials Engineering, Taiyuan Institute of Technology, Taiyuan 030008, China

<sup>b</sup> College of Chemical Engineering and Technology, Taiyuan University of Technology, Taiyuan 030600, China

#### **Corresponding Author**

Jian-Bin Zhen – Taiyuan Institute of Technology, Department of Materials Engineering, Taiyuan 030008, Shanxi Province, China; Email: zhenjb187@163.com

#### **Characterization**

##### **Proton Nuclear Magnetic Resonance (<sup>1</sup>H NMR)**

The NMR spectra were recorded on a Bruker AV 400 MHz spectrometer using tetramethylsilane as an internal standard and DMSO-*d*<sub>6</sub> and D<sub>2</sub>O as the solvents.

##### **UV-vis Spectroscopy**

The UV-vis absorption spectra were recorded on an Agilent 8453 UV-visible spectrophotometer (Agilent Technologies, CA, USA) using a quartz cell with a path length of 1.0 cm. The absorbance and transmittance spectra of GH and PGH@AgNPs were measured.

##### **X-ray photoelectron spectroscopy (XPS)**

The reduction of silver ions (Ag<sup>+</sup>) to metallic silver was characterized using a VG Micro Tech ESCA 3000 X-ray photoelectron spectroscope (VG Scientific, Sussex, United Kingdom) equipped with a multichanneltron hemispherical electron energy analyzer. The sample was placed on Si(111) substrate, and the spectra were recorded.

##### **X-ray diffraction (XRD)**

The crystal structure of PGH@AgNPs was investigated on a Rigaku, D/max-2500 X-

ray diffractometer using a Cu K $\alpha$  X-ray source at 60 Kv and 300 mA. The PGH@AgNPs solution was freeze-dried for XRD measurement. The XRD pattern was taken in the 2 $\theta$  range of 30-80° at a scan speed of 0.2 sec/step.

### **Scanning Electron Microscopy (SEM)**

The morphologies of PGH@AgNPs and bacteria were observed using SEM. The PGH@AgNPs solution was spread on the silicon wafer and freeze-dried. Bacterial cells at the mid-log growth phase (OD<sub>600</sub>=0.4~0.6) were treated with PGH@AgNPs. After treatment, bacteria were collected, washed with PBS, and fixed with 2.5% (v/v) glutaraldehyde for 2-4 h. Then, bacteria were dehydrated using 30, 50, 70, 90 and 100% ethanol. After dehydration, bacteria were re-suspended in tertiary butyl alcohol, dripped on the silicon wafer, and freeze-dried. Samples were coated with gold before observation.

### **Zeta Potential**

Zeta potential was measured on a water Nano-ZS 90 Nanosizer (Malvern Instrument Ltd., Worcestershire, UK) at a fixed scattering angle of 90° at room temperature.

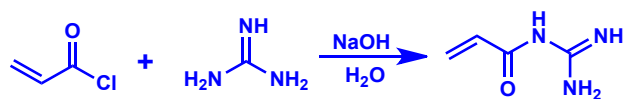

**Scheme S1. Synthetic route of GH**

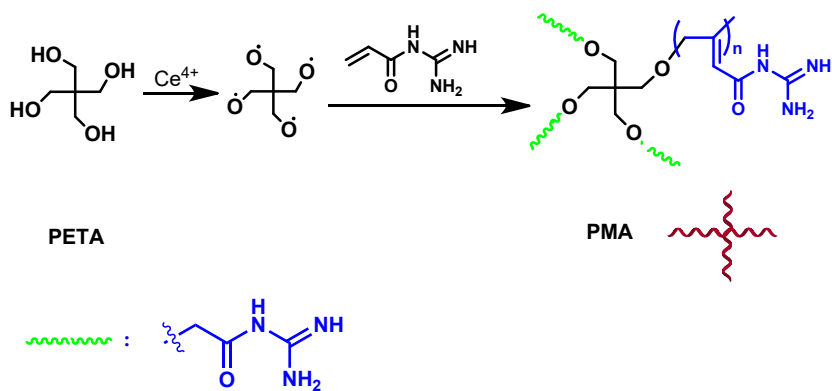

**Scheme S2. Synthetic route of PGH**

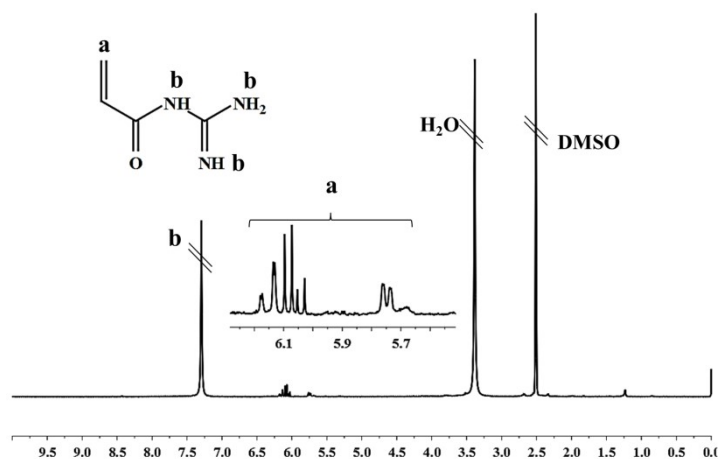

**Figure S1. <sup>1</sup>H NMR spectrum of GH in DMSO-*d*<sub>6</sub>**

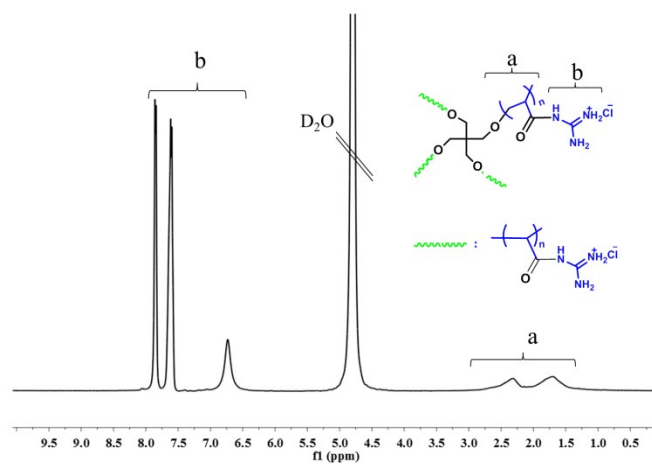

**Figure S2.  $^1\text{H}$  NMR spectrum of PGH in  $\text{D}_2\text{O}$**

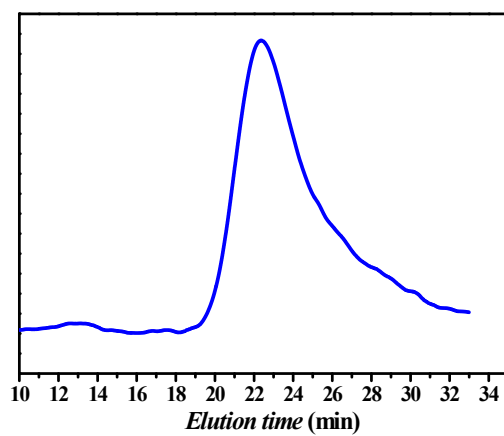

**Figure S3. GPC trace of PGH in water at  $40^\circ\text{C}$**

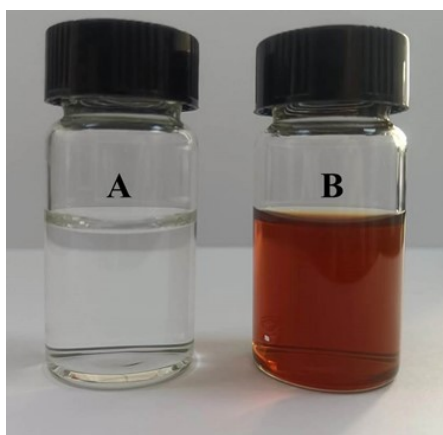

**Figure S4. Photographs of PGH (A) and PGH@AgNPs dispersed in aqueous solution**
